# Supplementary material
Source: publisher figshare collection journal article supplement (https://rs.figshare.com/ndownloader/files/14331539)
Supplement: Supplementary file 1 [file 14331539]

**Electronic Supplementary Material (ESM)**

**J Zhang *et al*., Relevance of heterokaryosis for adaptation and azole-resistance development in *Aspergillus fumigatus. Proceedings B.* DOI: 10.1098/rspb.2018.2886**

**ESM Table S2. The mutant strains used for forming the heterokaryons and diploids in Figure 3 and 5.**

| Strain | Original strain  (See Table 2) | Azole-resistance level  (based on the MIC to difenoconazole) | Nitrate utilisation marker | Spore colour | |
| --- | --- | --- | --- | --- | --- |
| SCW | CBS 140053 | Sensitive(S) MIC(D)=2 | cnx | White | |
| SNG | CBS 140053 | Sensitive(S) MIC(D)=2 | nia | Green |
| ING | CBS 140053-D3-7B | Intermediate(I)MIC(D)=8 | nia | Green | |
| RNG | CBS 140053-D1-7 | Resistance(R)MIC(D)=32 | nia | Green | |
